# Supplementary material
Source: MDPI journal article supplement (https://www.mdpi.com/1996-1073/16/19/6937)
Supplement: s1 [file s1]

**Table S1.** Fatty acid ethyl esters (FAEE) composition of raw material and of biodiesel samples produced by enzymatic transesterification using *Candida rugosa* lipase (CRL) and *Endomelanconopsis endophytica* lipase (EEL), determined by GC-MS.

| FAEE                              | Palmitate                                      |                                   | Linoleate                                      |                                   | Oleate                                         |                                   | Stearic                                        |                                   |
|-----------------------------------|------------------------------------------------|-----------------------------------|------------------------------------------------|-----------------------------------|------------------------------------------------|-----------------------------------|------------------------------------------------|-----------------------------------|
| Molecular formula                 | C <sub>18</sub> H <sub>36</sub> O <sub>2</sub> |                                   | C <sub>18</sub> H <sub>36</sub> O <sub>2</sub> |                                   | C <sub>20</sub> H <sub>38</sub> O <sub>2</sub> |                                   | C <sub>20</sub> H <sub>40</sub> O <sub>2</sub> |                                   |
| CAS number                        | 628-97-7                                       |                                   | 544-35-4                                       |                                   | 111-62-6                                       |                                   | 111-61-5                                       |                                   |
| Raw material and Biodiesel Sample | Retention time <sup>a</sup><br>(min)           | Concentration <sup>b</sup><br>(%) |
| Soybean oil                       | 18.234                                         | 4.84                              | 19.926                                         | 49.92                             | 19.998                                         | 7.65                              | 20.129                                         | 1.39                              |
| Waste cooking oil                 | 18.227                                         | 5.84                              | 19.916                                         | 53.95                             | 19.989                                         | 8.93                              | 20.133                                         | 1.69                              |
| CRL 2:1                           | 18.229                                         | 5.98                              | 19.913                                         | 49.27                             | 19.987                                         | 5.59                              | 20.126                                         | 2.12                              |
| CRL 3:1                           | 18.237                                         | 5.24                              | 19.937                                         | 49.99                             | 19.996                                         | 8.65                              | 20.132                                         | 2.18                              |
| EEL 2:1                           | 18.231                                         | 6.61                              | 19.923                                         | 50.55                             | 19.961                                         | 4.61                              | 20.127                                         | 1.35                              |
| EEL 3:1                           | 18.236                                         | 5.50                              | 19.927                                         | 50.12                             | 19.949                                         | 4.75                              | 20.130                                         | 1.23                              |

<sup>a</sup>Peak assignment is based on m/z of the molecular ion peak. <sup>b</sup>FAEE concentration was calculated from GC-MS analysis, considering the peak area.
